# Supplementary material for: Transient polymer electronics enabled by grafting of oligo-3-hexylthiophenes onto polycaprolactone
Source: Royal Society of Chemistry journal article supplement (doi:10.1039/d3tc04621d), 2024-01-01
Supplement: d3tc04621d1.pdf [file d3tc04621d1.pdf]

## Supplementary Information

# Transient Polymer Electronics Enabled by Grafting of Oligo-3-hexylthiophenes onto Polycaprolactone

Eddie Wai Chi Chan<sup>a,b</sup>, Xin Sun<sup>a,b</sup>, Yuhka Uda<sup>a,b</sup>, Bicheng Zhu<sup>a,b</sup>, David Barker<sup>a,b</sup>, Jadranka Travas-Sejdic<sup>\*a,b</sup>

<sup>a</sup>Centre for Innovative Materials for Health, School of Chemical Sciences, The University of Auckland - Waipapa Taumata Rau, 23 Symonds Street, Auckland, 1023, New Zealand

<sup>b</sup>MacDiarmid Institute for Advanced Materials and Nanotechnology, Kelburn Parade, Wellington, 6140, New Zealand

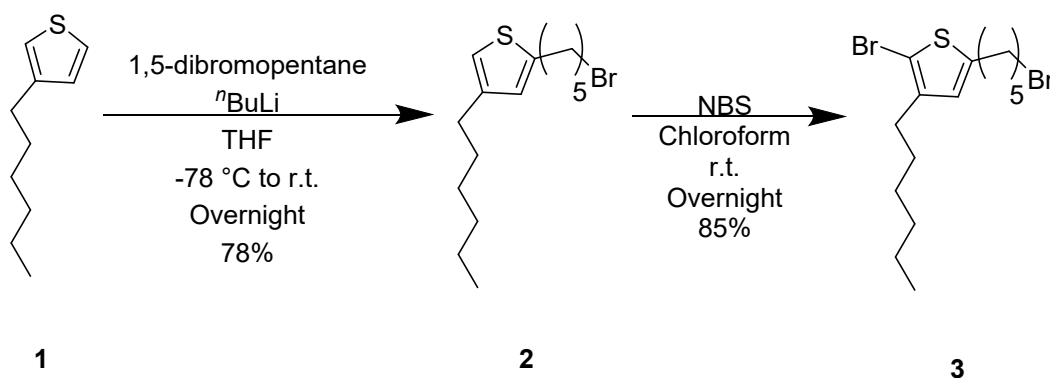

Scheme S1: Synthesis of capping group 2-bromo-5-(bromomethyl)-3-hexylthiophene **3**.

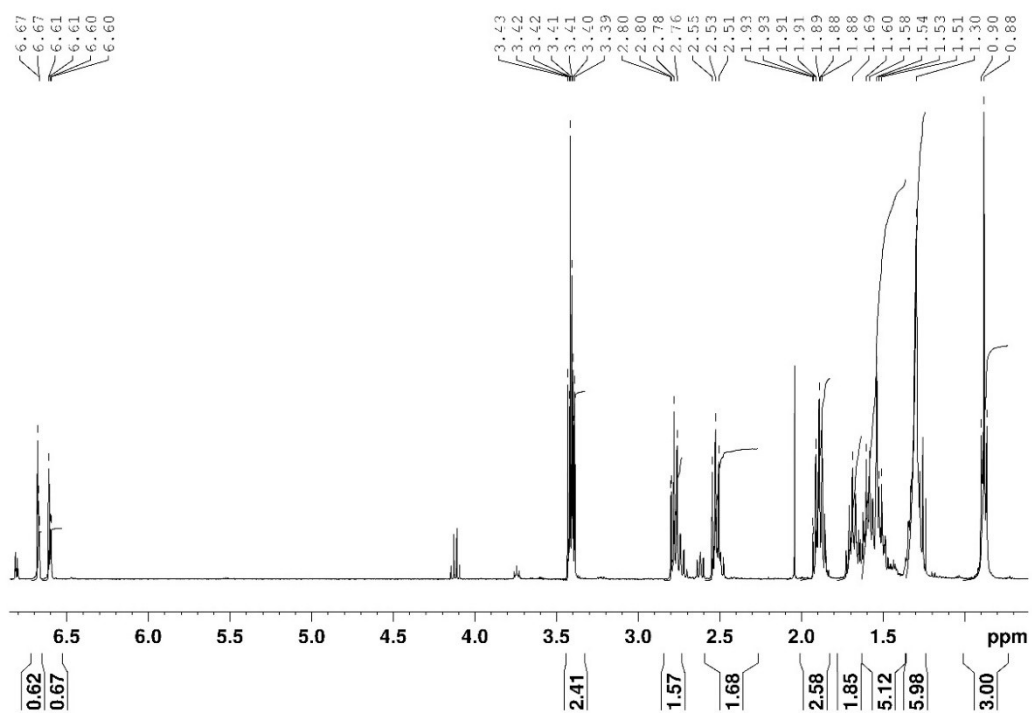

Figure S1:  $^1\text{H}$  NMR spectra of 2-(5-bromopentyl)-4-hexylthiophene **2**.

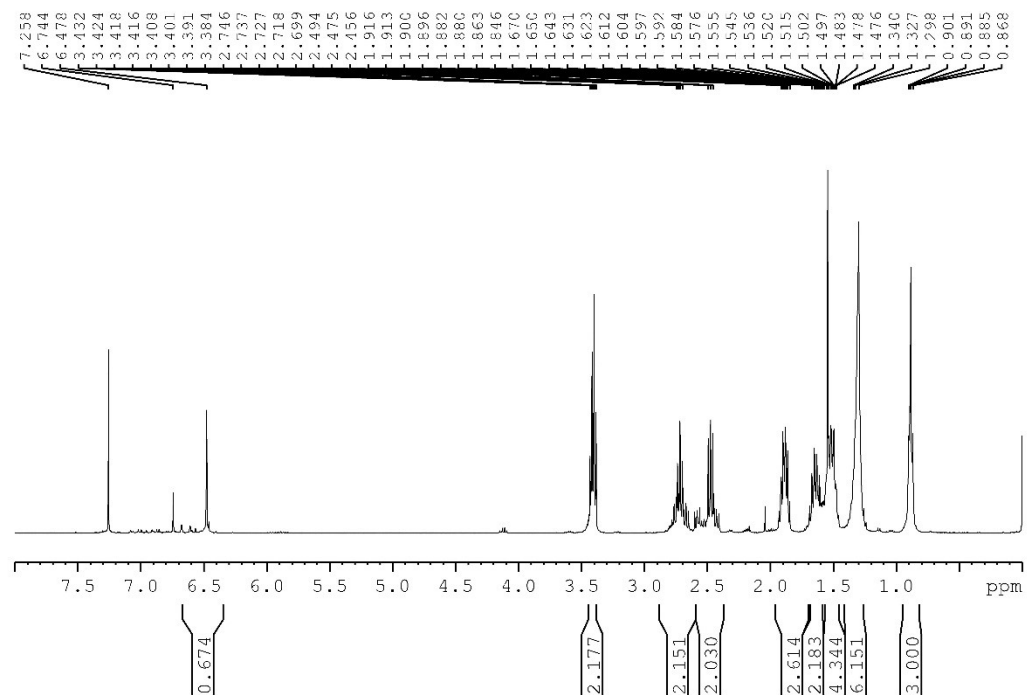

Figure S2:  $^1\text{H}$  NMR spectra of 2-bromo-5-(bromomethyl)-3-hexylthiophene **3**.

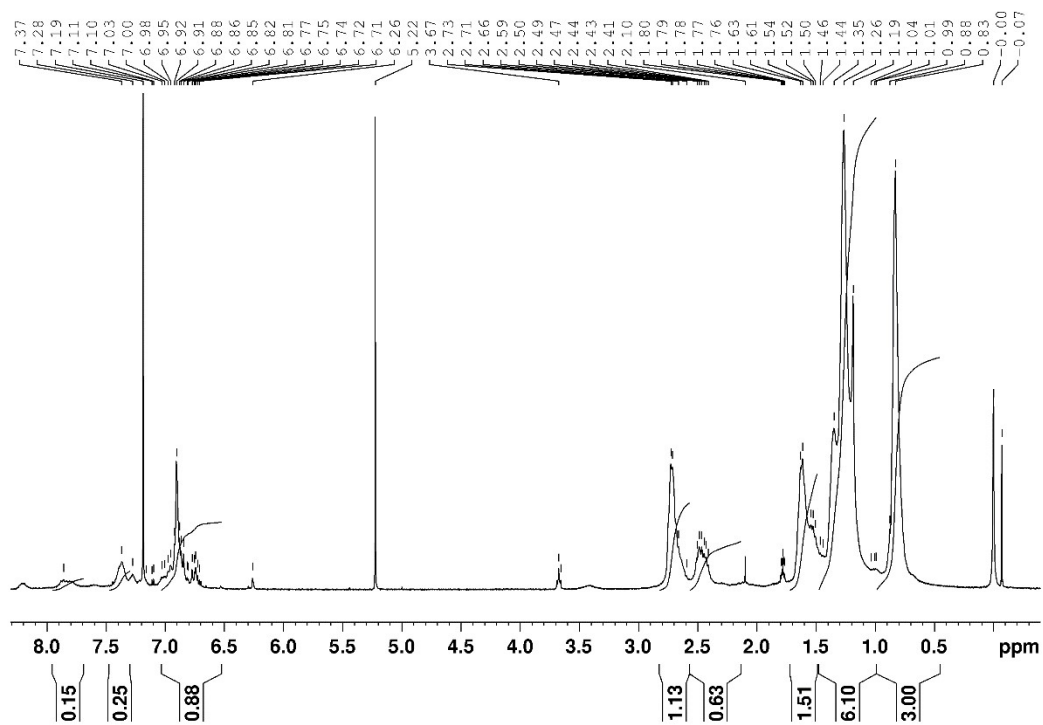

Figure S3:  $^1\text{H}$  NMR spectra of O3HT-15.

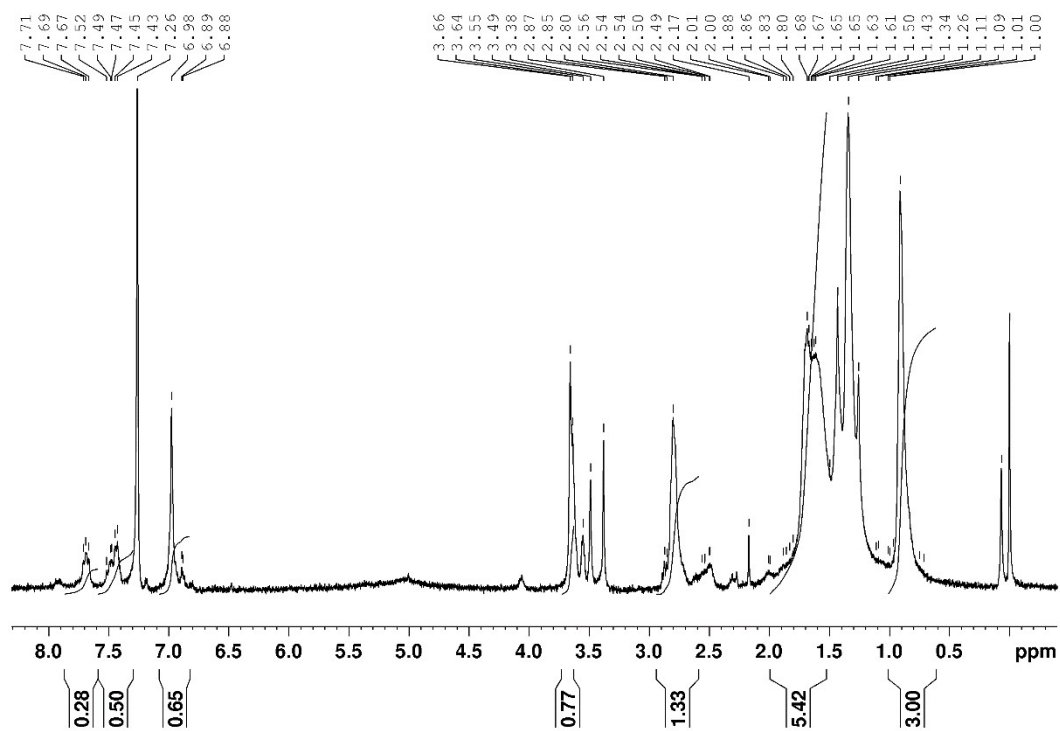

Figure S4:  $^1\text{H}$  NMR spectra of O3HT-30.

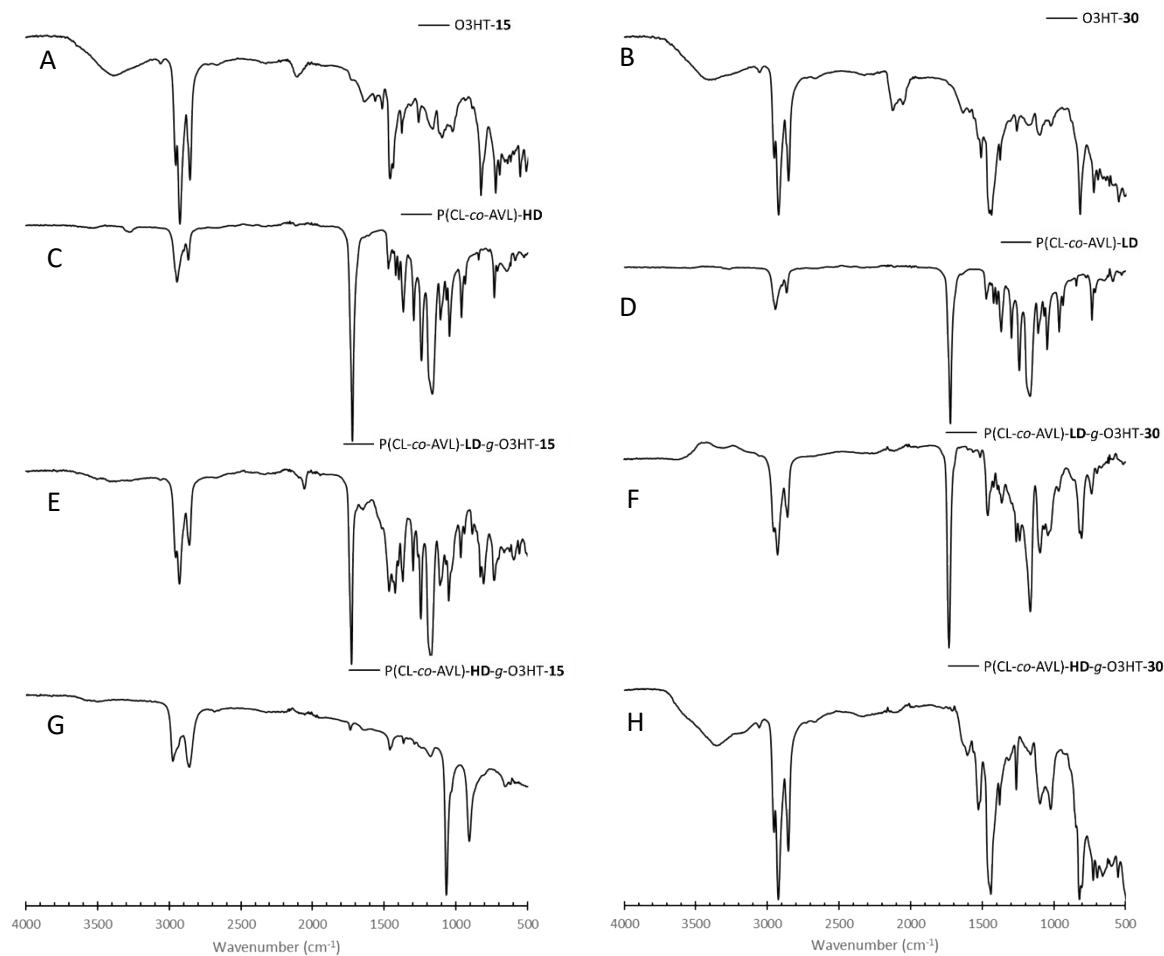

Figure S5: Normalized FT-IR spectra of O3HT-15 (A), O3HT-30 (B), P(CL-co-AVL)-LD (C), P(CL-co-AVL)-HD (D), P(CL-co-AVL)-LD-g-O3HT-15 (E), P(CL-co-AVL)-HD-g-O3HT-15 (F), P(CL-co-AVL)-LD-g-O3HT-30 (G) and P(CL-co-AVL)-HD-g-O3HT-30 (H).

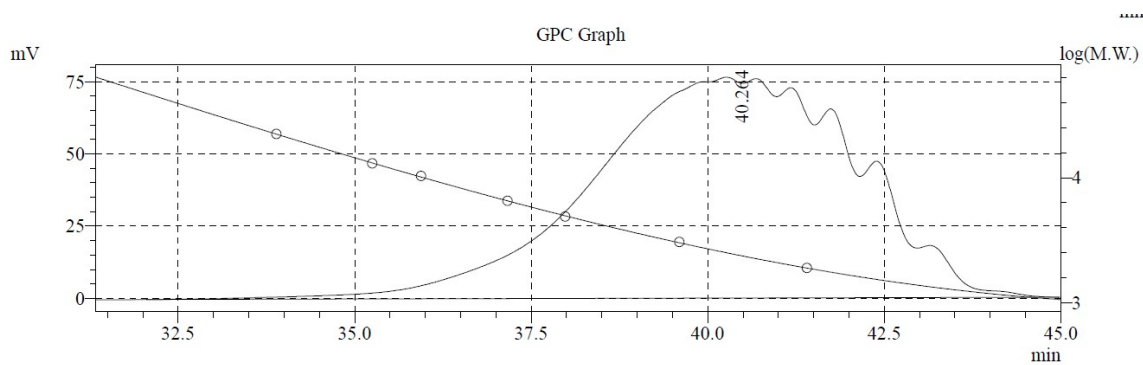

Figure S6: GPC trace of O3HT-15

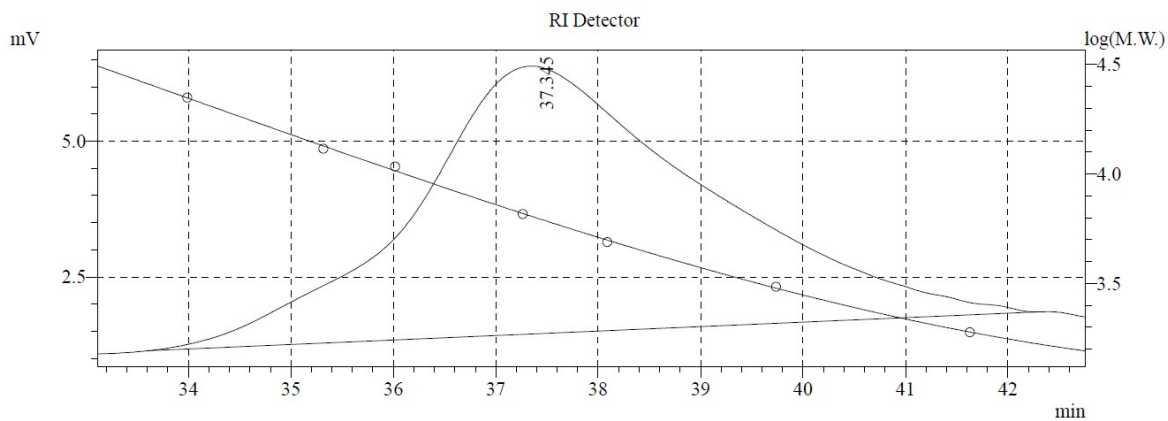

Figure S7: GPC trace of O3HT-30

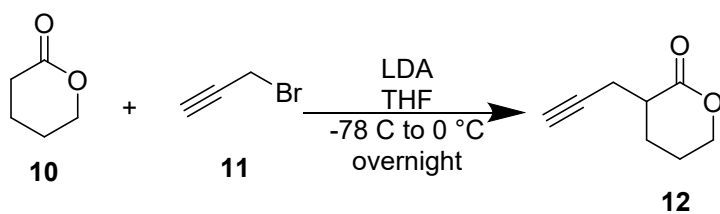

Scheme S2: Synthesis of 3-(prop-2-yn-1-yl)tetrahydro-2H-pyran-2-one **12** (alkyne-valerolactone).

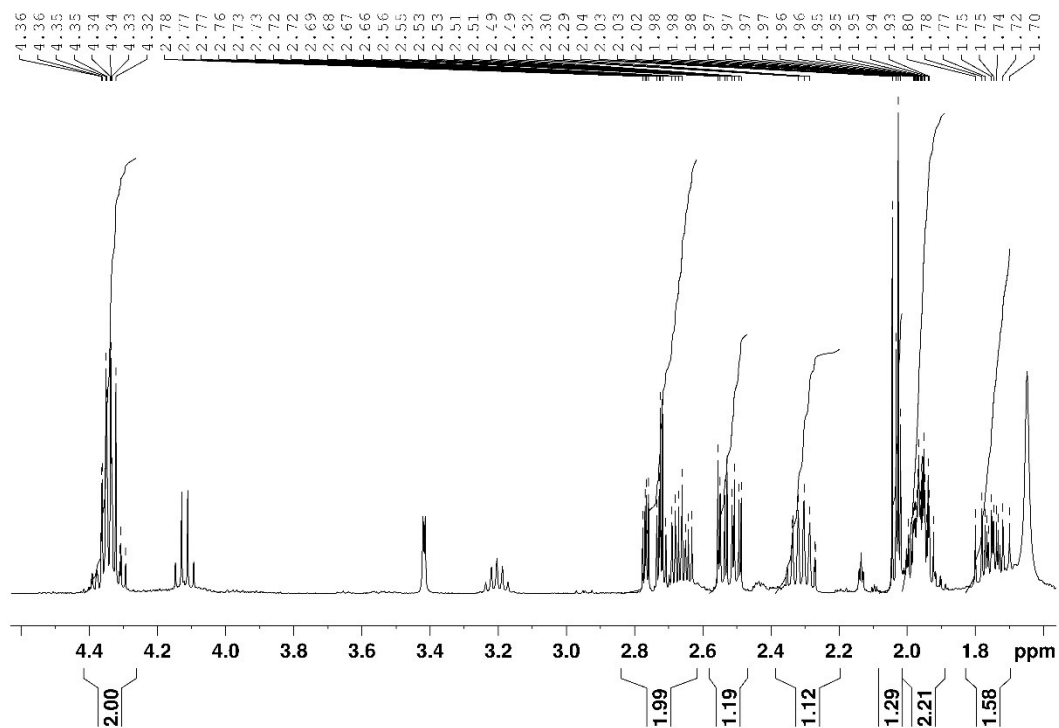

Figure S8:  $^1\text{H}$  NMR spectra of alkyne-valerolactone **12**.

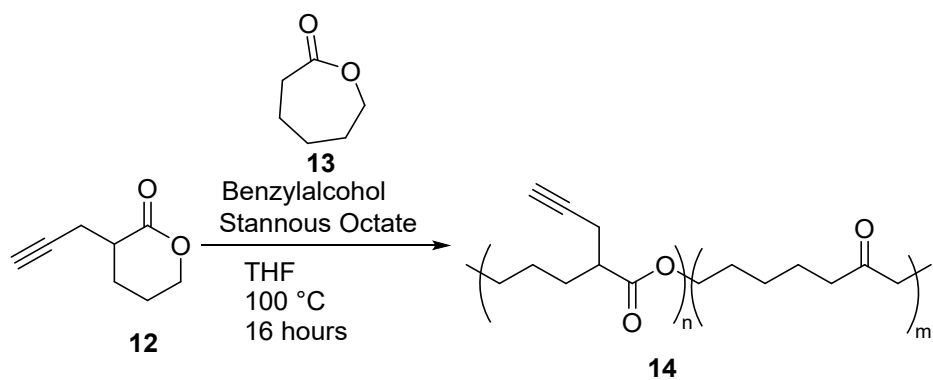

Scheme S3: Synthesis of P(CL-co-AVL) **14**.

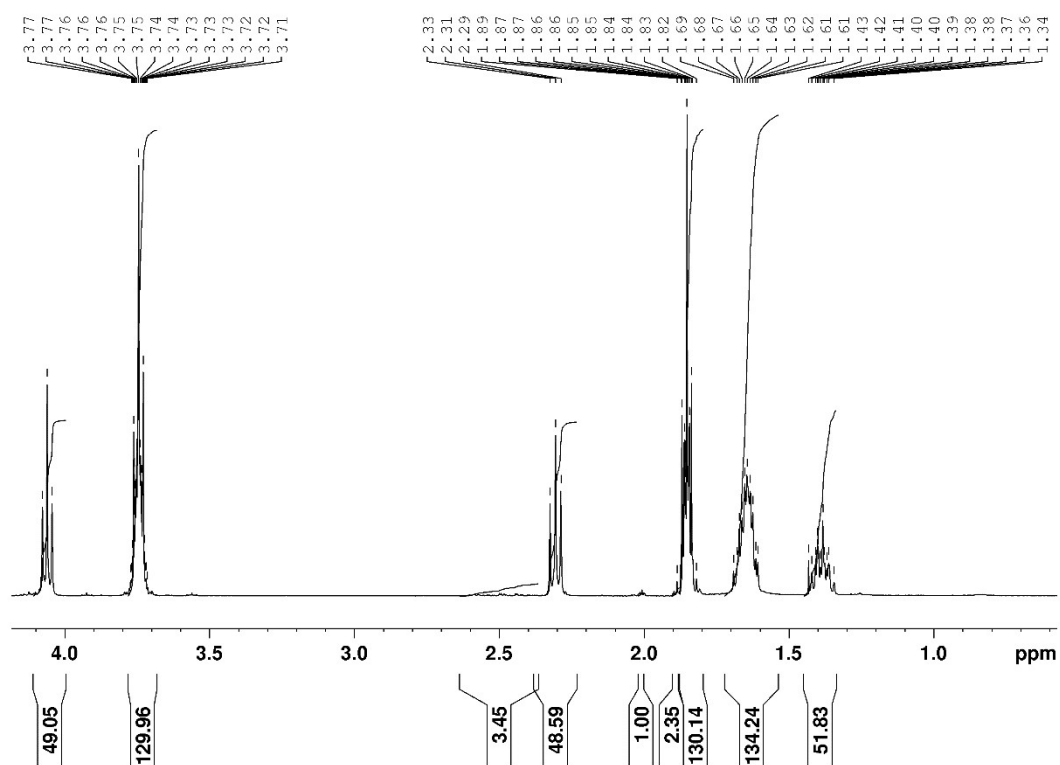

Figure S9: <sup>1</sup>H NMR spectra P(CL-co-AVL)-LD.

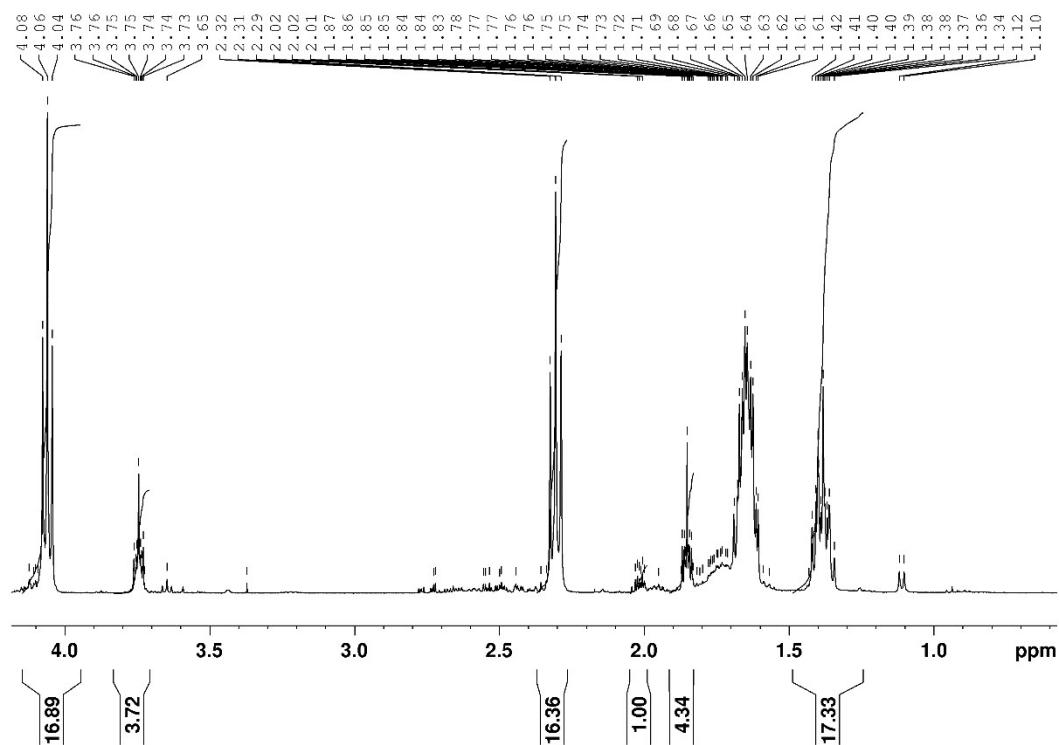

Figure S10:  $^1\text{H}$  NMR spectra of P(CL-co-AVL)-HD.

Table S1: Molecular weight determination of P(CL-co-AVL) using GPC analysis.

| Polymer         | $M_n$ (Da) | $M_w$ (Da) | $M_z$ (Da) | $\bar{D}$ | Length (mers) |
|-----------------|------------|------------|------------|-----------|---------------|
| P(CL-co-AVL)-LD | 30640      | 38685      | 45999      | 1.26      | 340           |
| P(CL-co-AVL)-HD | 8631       | 11405      | 14695      | 1.32      | 103           |

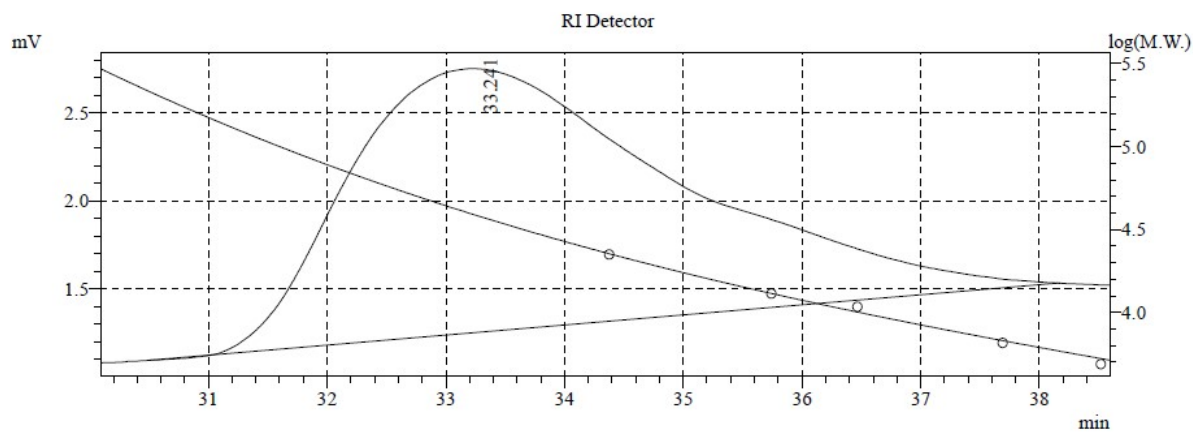

Figure S11: GPC trace of P(CL-co-AVL)-LD.

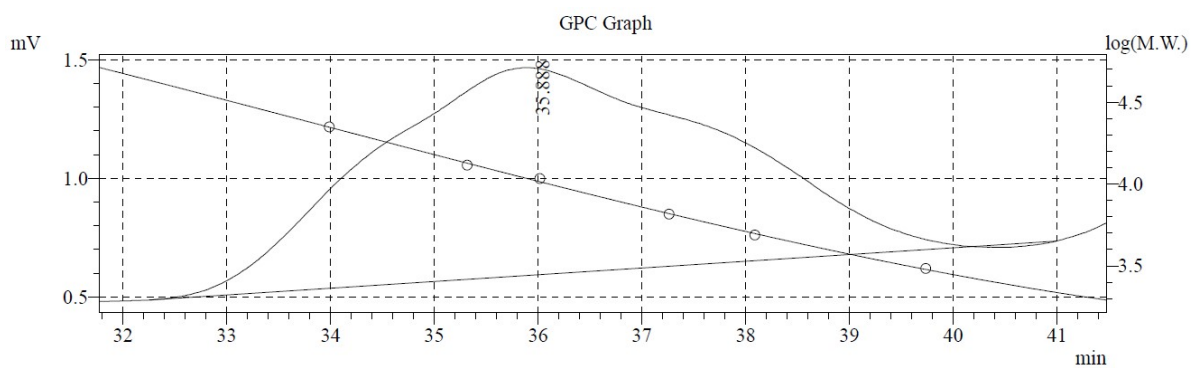

Figure S12: GPC trace of P(CL-co-AVL)-HD.

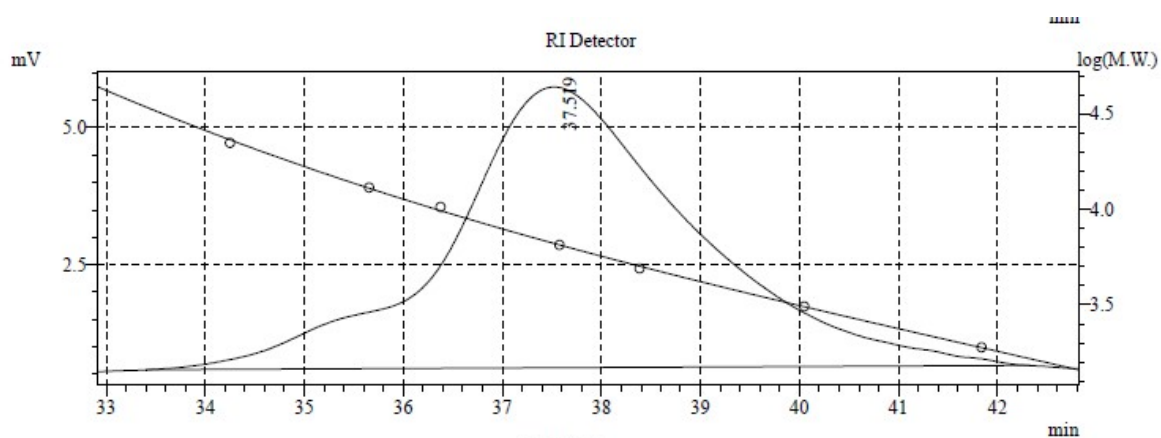

Figure S13: GPC trace of P(CL-co-AVL)-LD-g-O3HT-15.

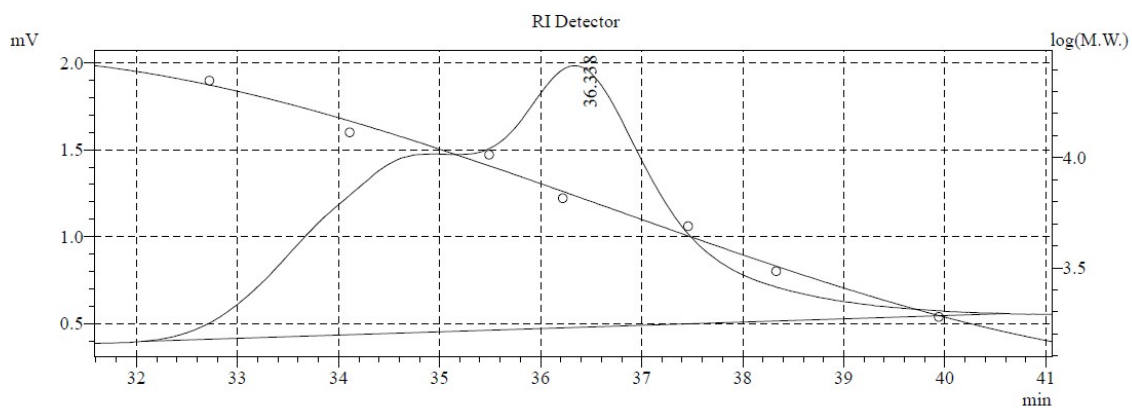

Figure S14: GPC trace of P(CL-co-AVL)-HD-g-O3HT-15.



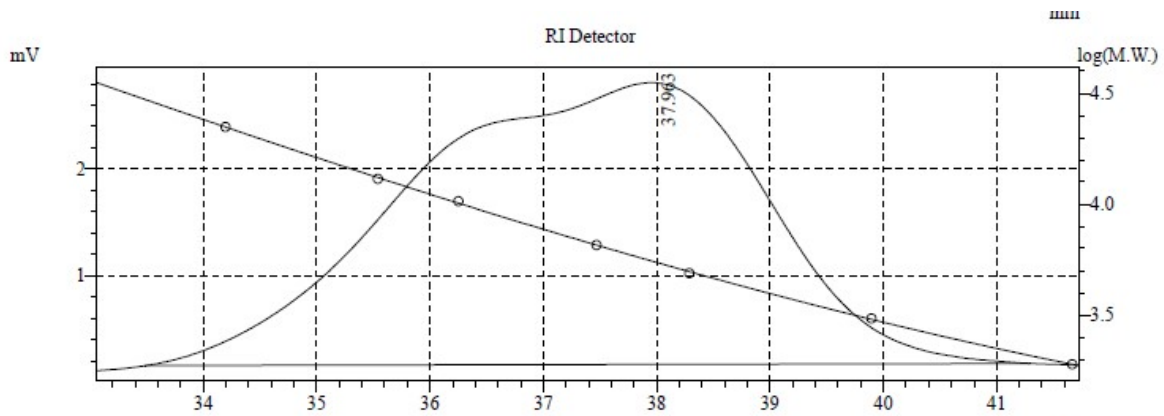

Figure S15: GPC trace of P(CL-co-AVL)-LD-g-O3HT-30.

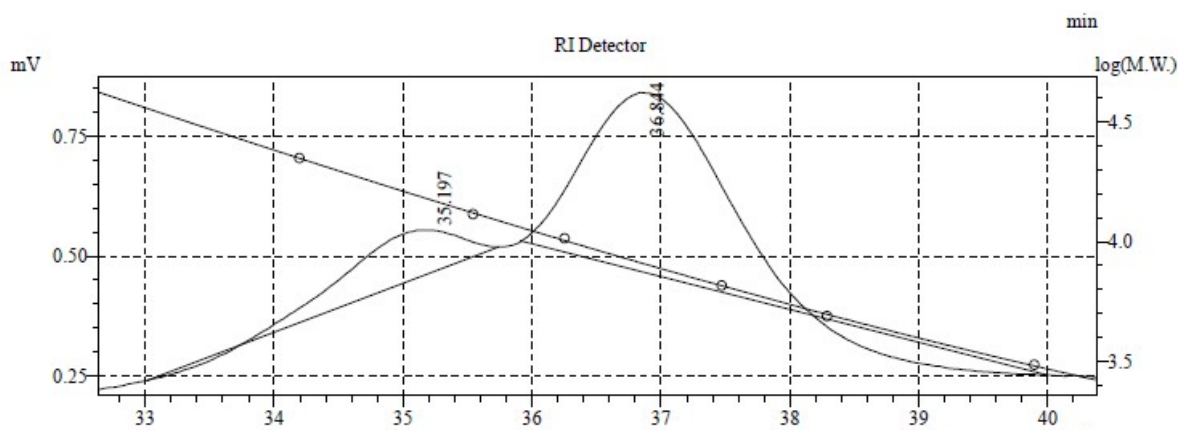

Figure S16: GPC trace of P(CL-co-AVL)-HD-g-O3HT-30.

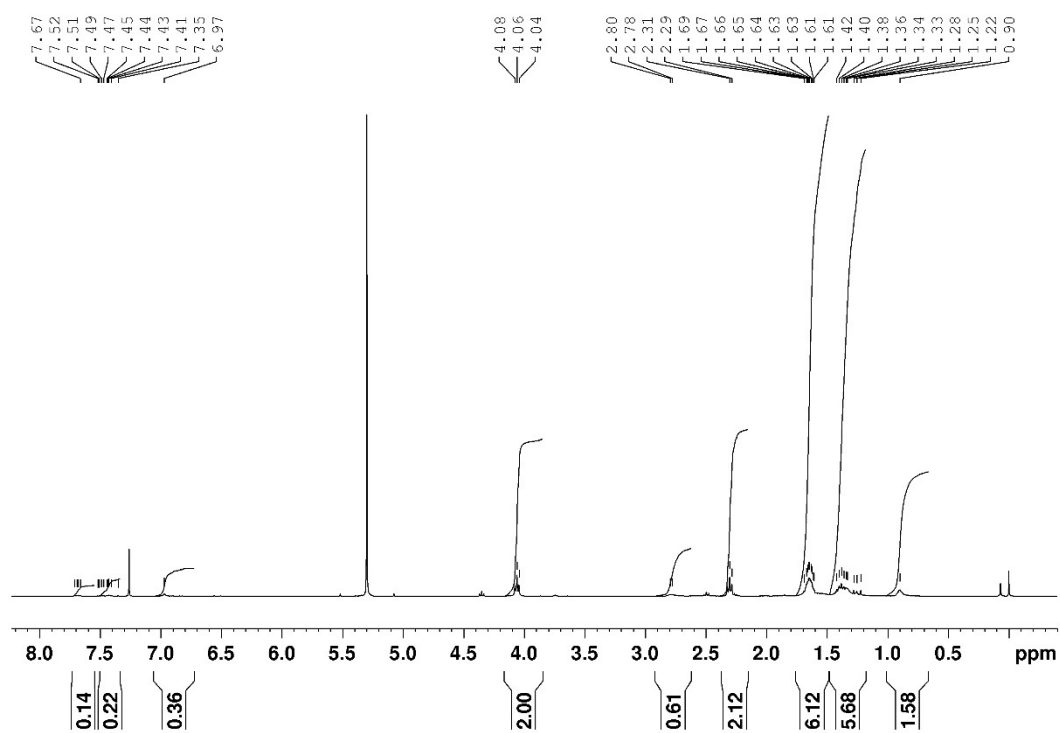

Figure S17:  $^1\text{H}$  NMR spectra of P(CL-co-AVL)-LD-g-O3HT-15.

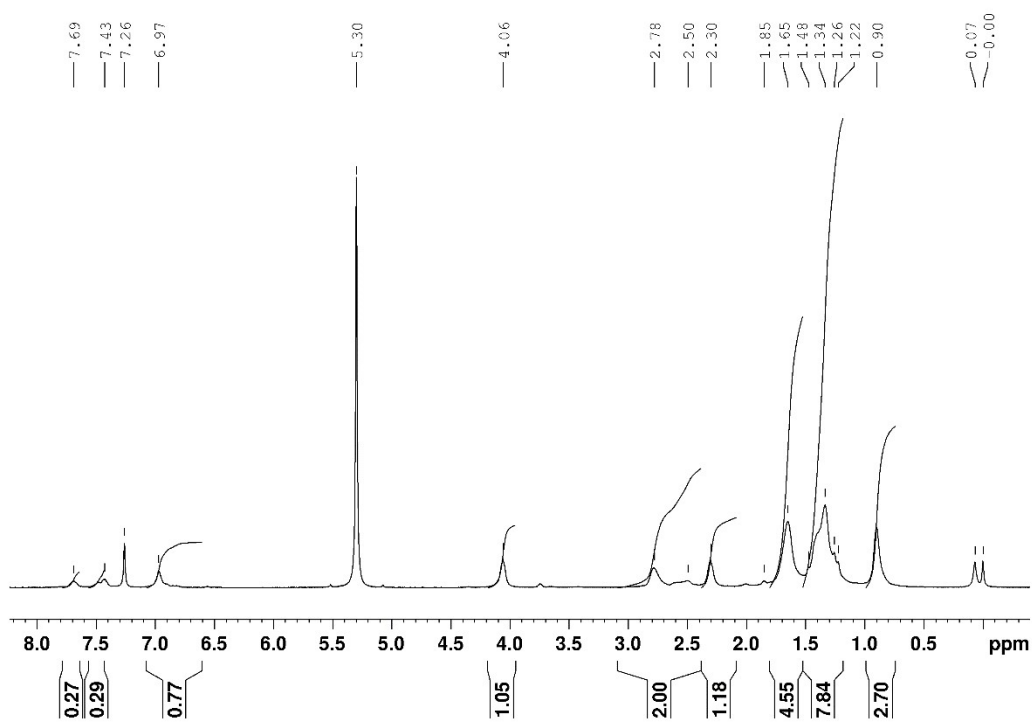

Figure S18:  $^1\text{H}$  NMR spectra of P(CL-co-AVL)-HD-g-O3HT-15.

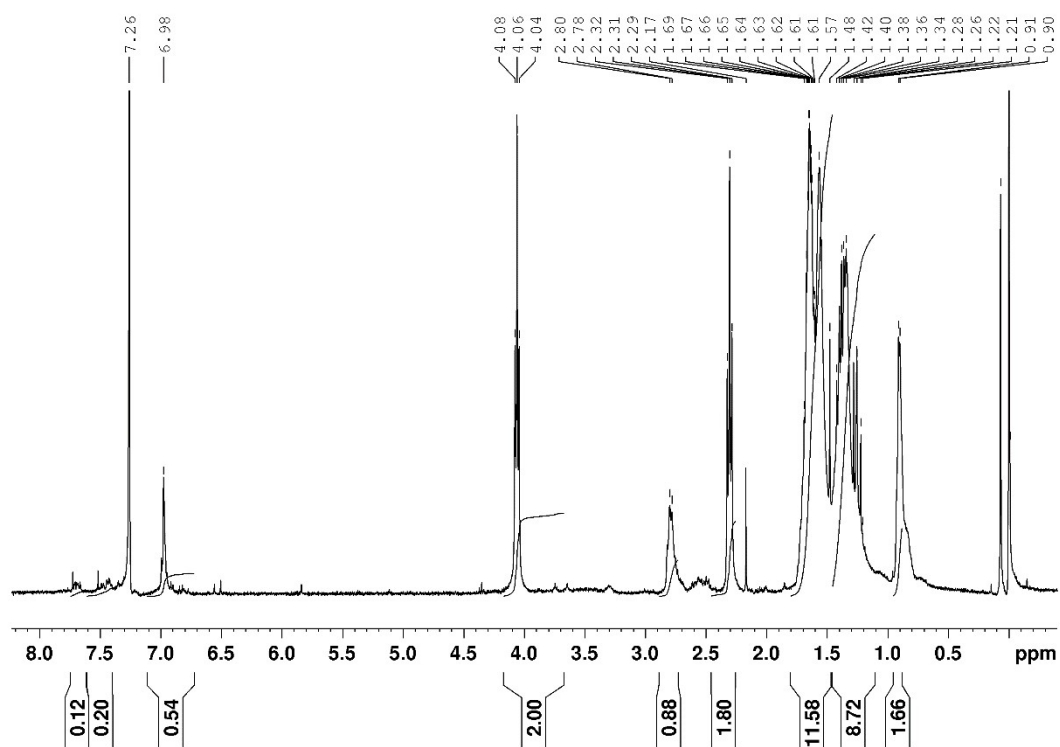

Figure S19:  $^1\text{H}$  NMR spectra of P(CL-co-AVL)-LD-g-O3HT-30.

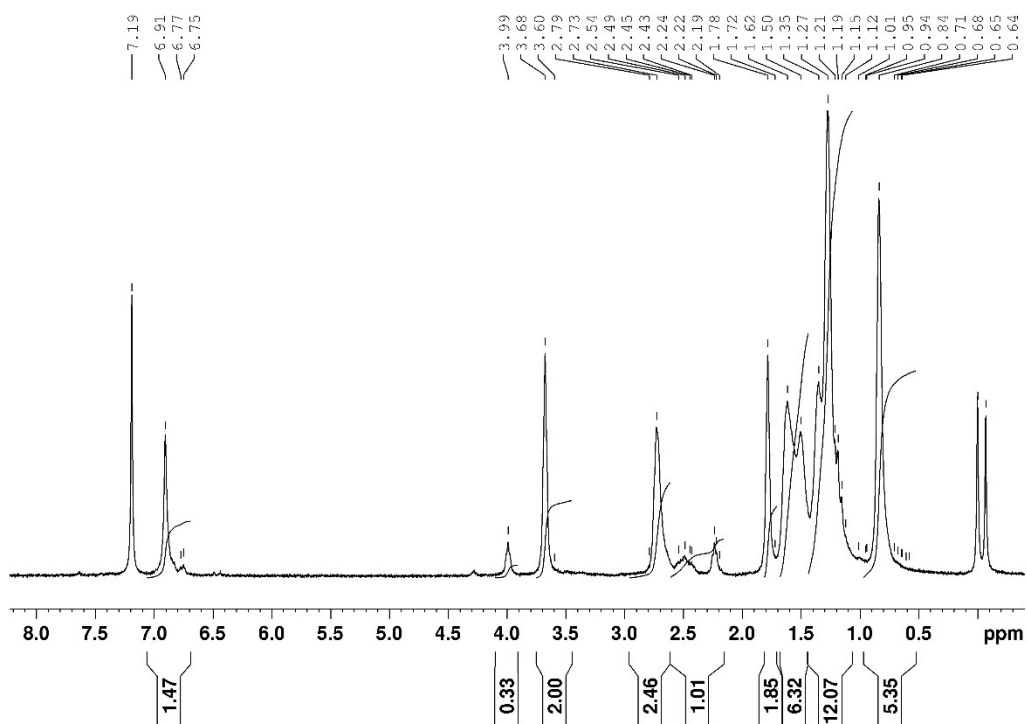

Figure S20:  $^1\text{H}$  NMR spectra of P(CL-co-AVL)-HD-g-O3HT-30.

Table S2: Conductivity (measured by 4-point probe method) and film thicknesses of the grafted P(CL-co-AVL)-g-O3HTs films on glass substrates ( $n \geq 3$ ).

| Sample                    | Film thickness ( $\mu\text{m}$ ) | Conductivity ( $\text{mS cm}^{-1}$ ) |
|---------------------------|----------------------------------|--------------------------------------|
| P(CL-co-AVL)-LD-g-O3HT-15 | $49 \pm 5.5$                     | $(2.86 \pm 0.245) \times 10^{-2}$    |
| P(CL-co-AVL)-HD-g-O3HT-15 | $52 \pm 7.7$                     | $0.83 \pm 0.07$                      |
| P(CL-co-AVL)-LD-g-O3HT-30 | $60 \pm 4.1$                     | $0.87 \pm 0.35$                      |
| P(CL-co-AVL)-HD-g-O3HT-30 | $47 \pm 8.6$                     | $1.18 \pm 0.41$                      |

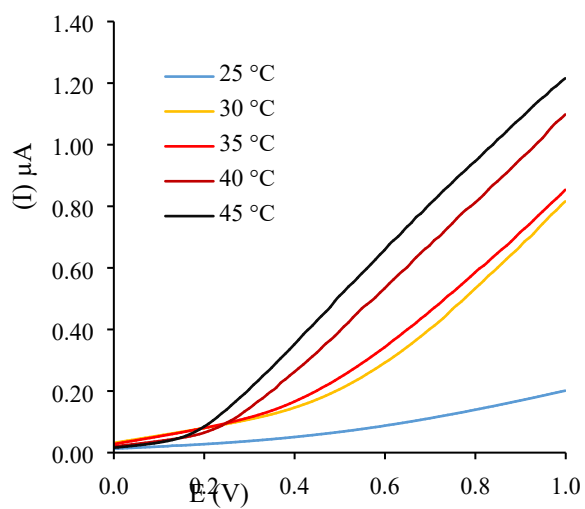

Figure S21.  $I$ - $V$  curves (from 0 V to 1 V) of P(CL-co-AVL)-HD-g-O3HT-30 at temperatures between room temperature (25 °C) and 45 °C.

Table S3: Temperature-dependent conductivities of the grafted P(CL-co-AVL)-HD-g-O3HT-30 calculated using the slopes from the linear parts of the curves in Figure S21.

| Temperature, °C | Conductivity (mS cm <sup>-1</sup> ) |
|-----------------|-------------------------------------|
| 25              | 0.02                                |
| 30              | 0.85                                |
| 35              | 0.89                                |
| 40              | 0.93                                |
| 45              | 1.00                                |

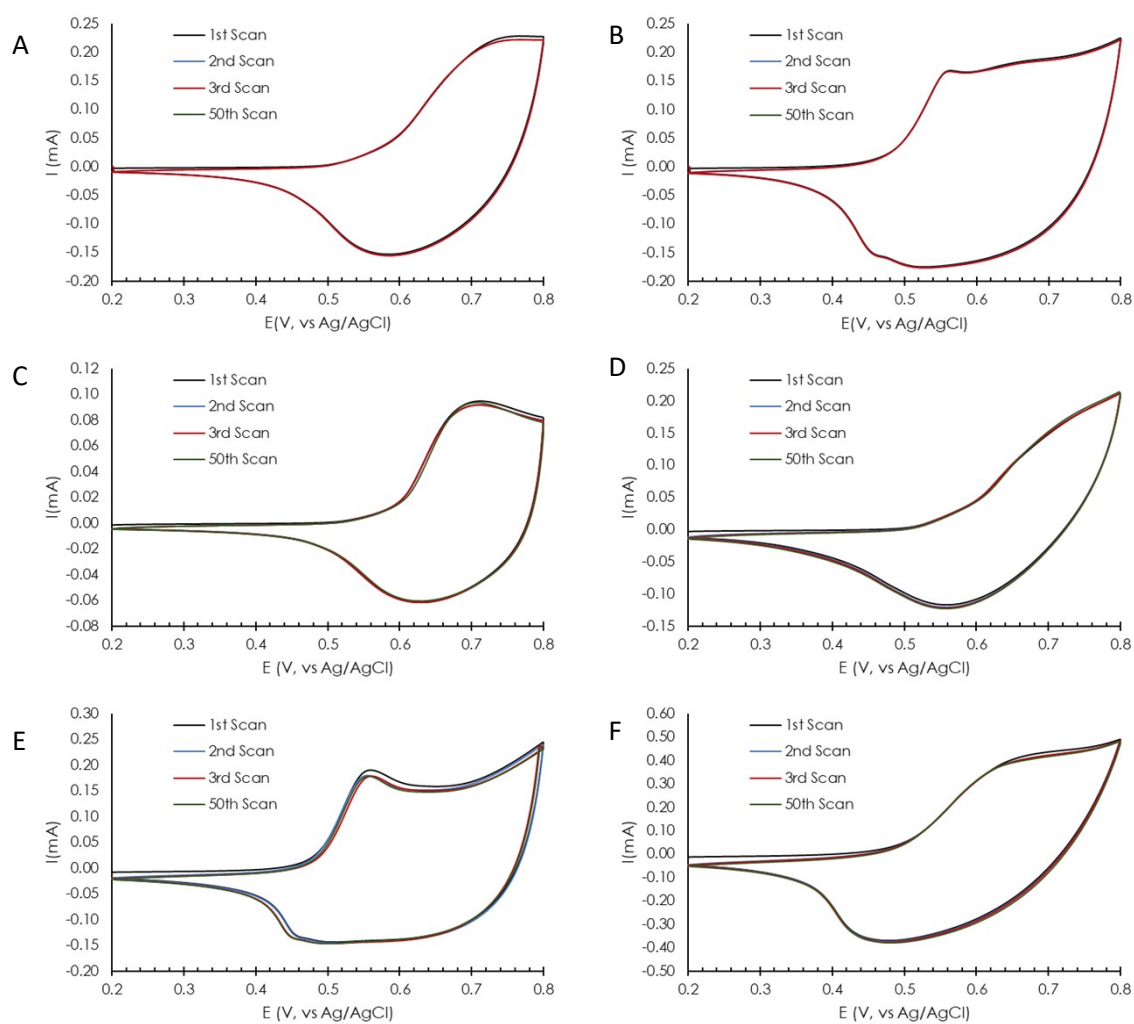

Figure S22: Cyclic Voltammograms of O3HT-15 (A), O3HT-30 (B), P(CL-co-AVL)-LD-g-O3HT-15 (C), P(CL-co-AVL)-HD-g-O3HT-15 (D), P(CL-co-AVL)-LD-g-O3HT-30 (E) and P(CL-co-AVL)-HD-g-O3HT-30 (F), cycled 50 cycles, with 1<sup>st</sup>, 2<sup>nd</sup>, 3<sup>rd</sup> and 50<sup>th</sup> scan shown.

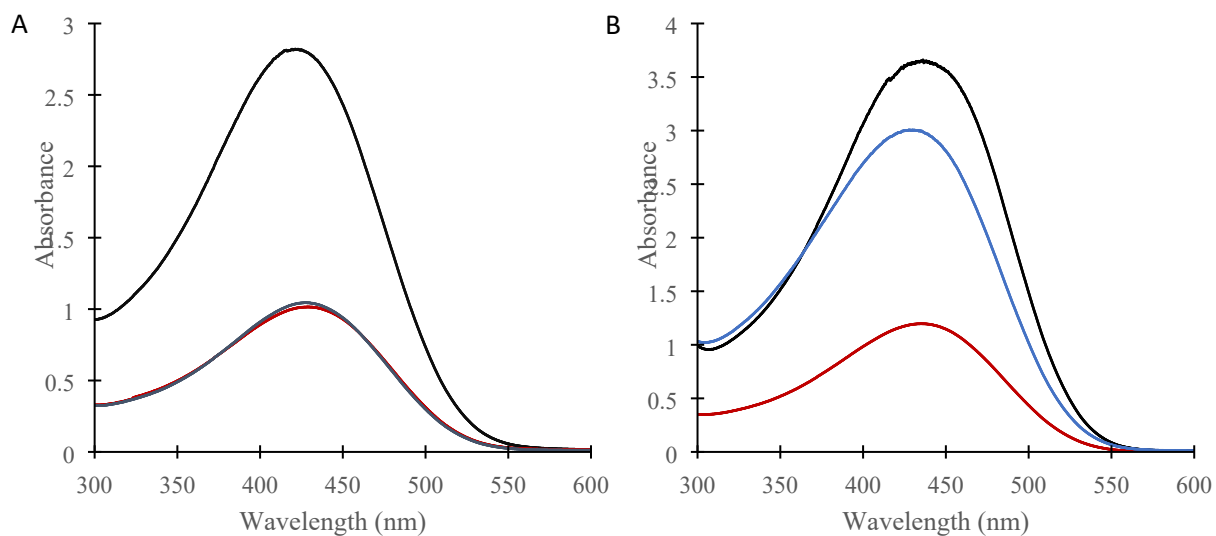

Figure S23: UV-Vis adsorption spectra of A) O3HT-15 (black), P(CL-co-AVL)-LD-g-O3HT-15 (red) and P(CL-co-AVL)-HD-g-O3HT-15 (blue) and B) O3HT-30 (black), P(CL-co-AVL)-LD-g-O3HT-30 (red) and P(CL-co-AVL)-HD-g-O3HT-30 (blue) in THF at 0.1 mg/mL.

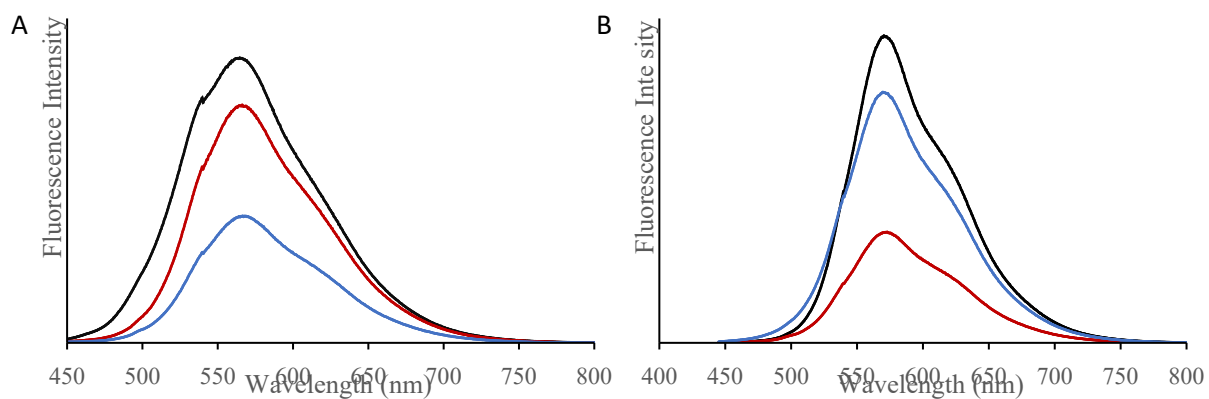

Figure S24: Fluorescence emission spectra of A) O3HT-15 (black), P(CL-co-AVL)-LD-g-O3HT-15 (red) and P(CL-co-AVL)-HD-g-O3HT-15 (blue) and B) O3HT-30 (black), P(CL-co-AVL)-LD-g-O3HT-30 (red) and P(CL-co-AVL)-HD-g-O3HT-15 (blue) in THF at 5  $\mu$ g/mL.

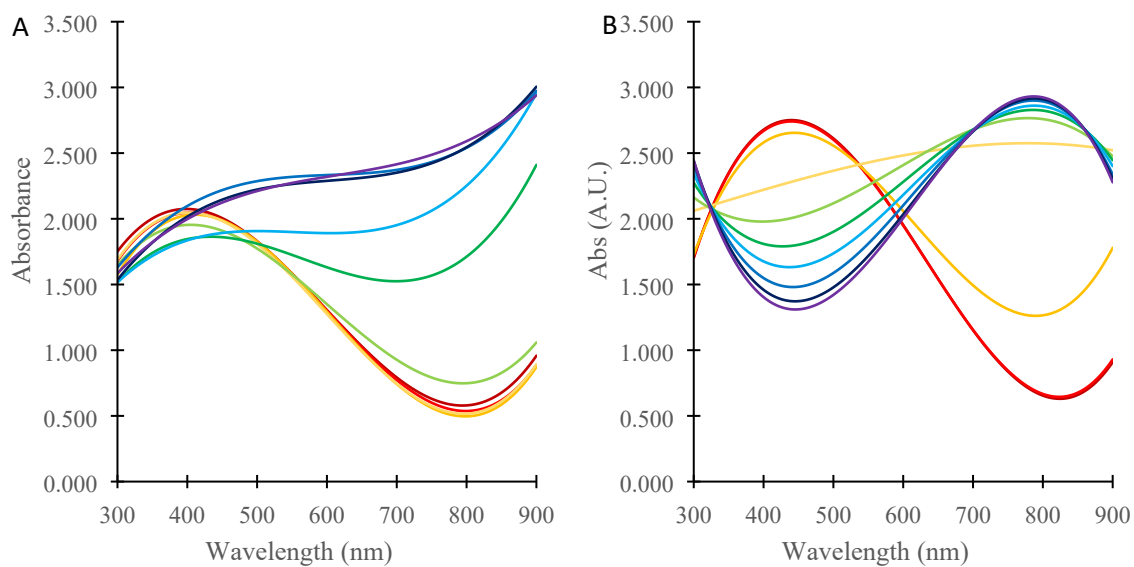

Figure S25: SEC spectra of O3HT-15 (A) and O3HT-30 (B) drop casted on ITO glass slides, between 0.1 V to 1.0 V, smoothed with 3rd Order Polynomial Fit.

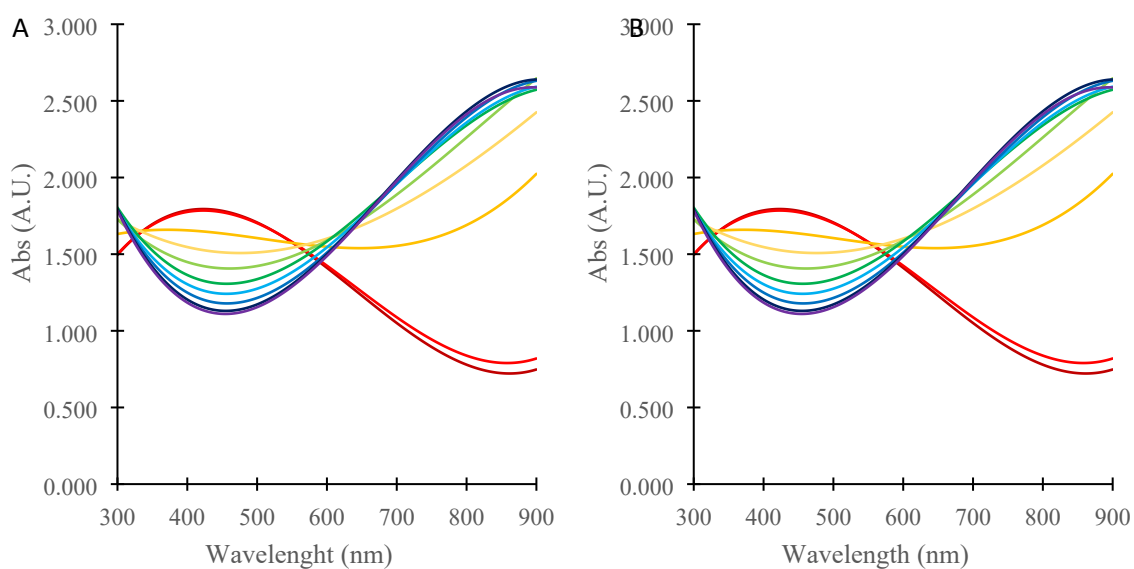

Figure S26: SEC spectra of P(CL-co-AVL)-LD-g-O3HT-30 (A) and P(CL-co-AVL)-HD-g-O3HT-30 (B) drop casted on ITO glass slides, between 0.1 V to 1.0 V, smoothed with 3rd Order Polynomial Fit.

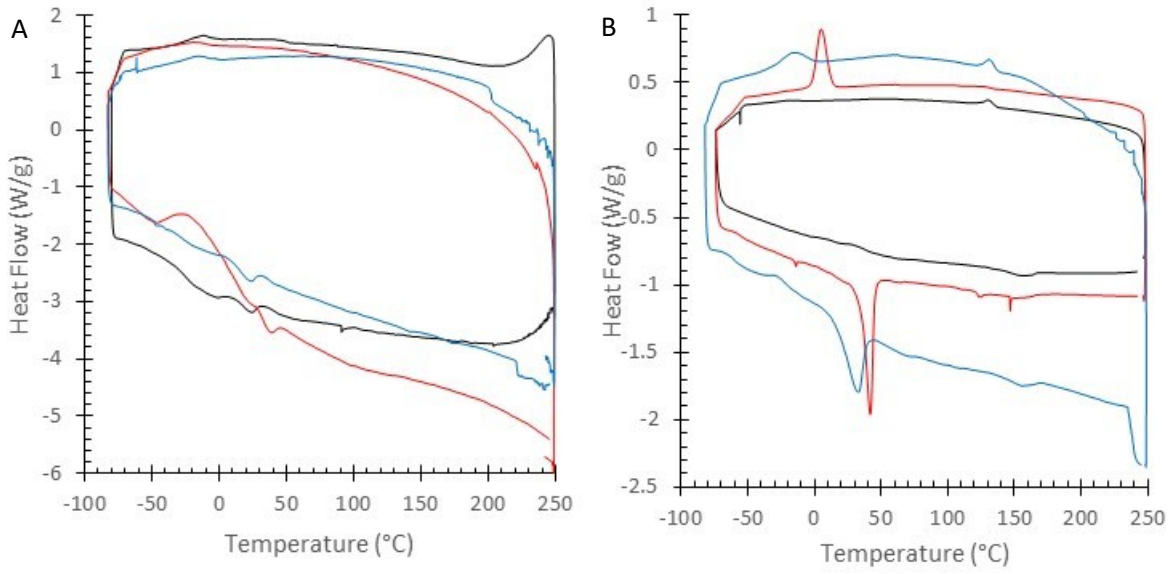

Figure S27: A) DSC curves of O3HT-15, P(CL-co-AVL)-LD-g-O3HT-15 (red) and P(CL-co-AVL)-HD-g-O3HT-15. B) DSC curves of O3HT-30, P(CL-co-AVL)-LD-g-O3HT-30 (red) and P(CL-co-AVL)-HD-g-O3HT-30 (blue).

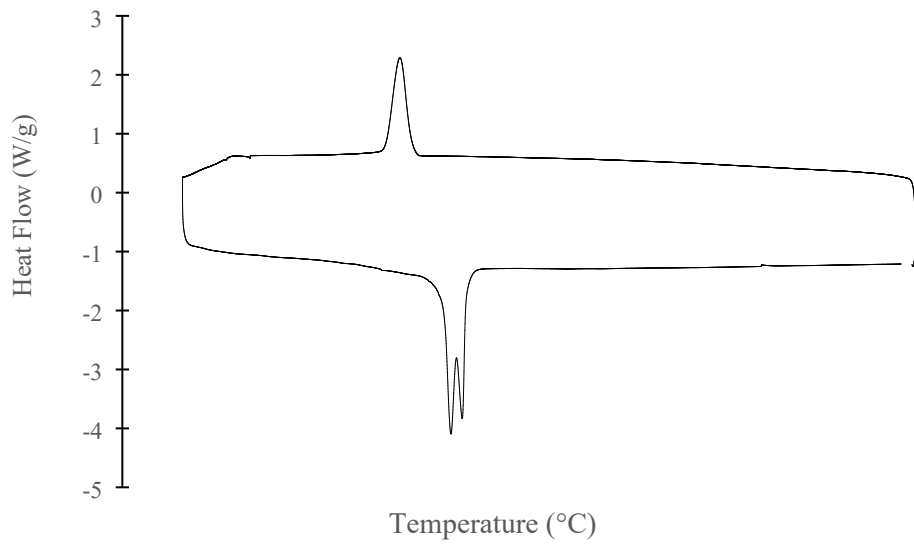

Figure S28: DSC scan of P(CL-co-AVL)-LD.



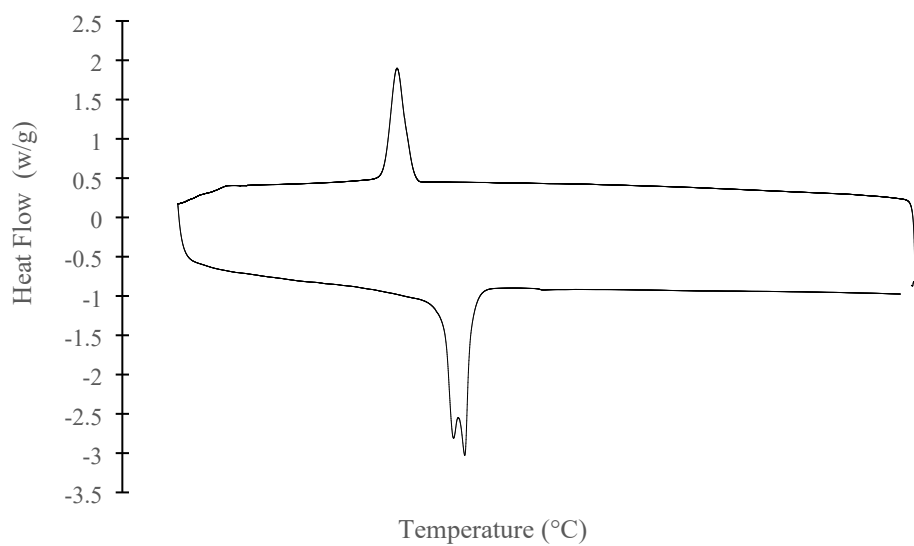

Figure S29: DSC scan of P(CL-co-AVL)-HD.

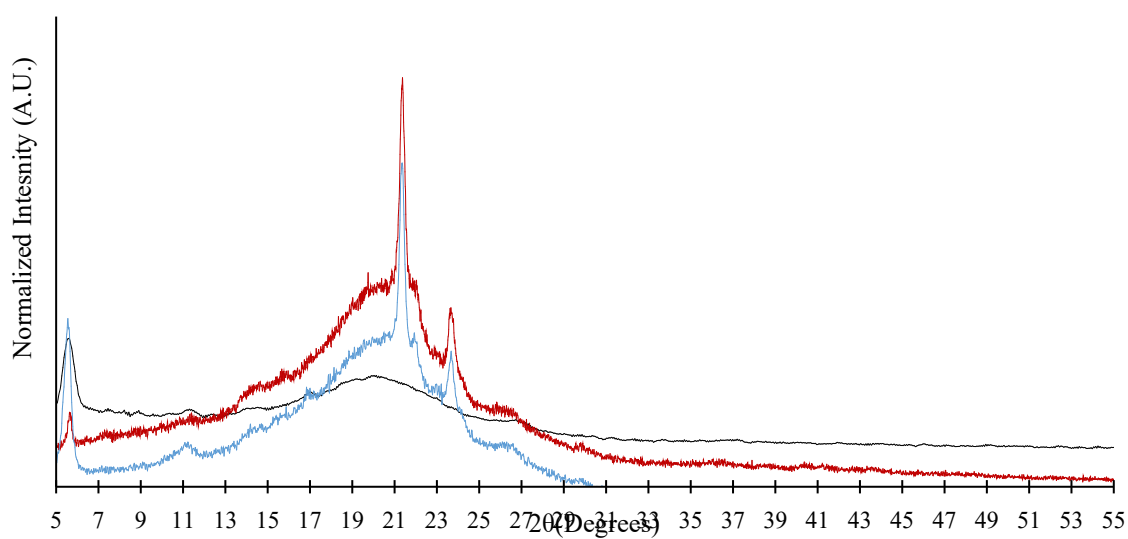

Figure S30: Normalized XRD spectra of O3HT-15 (black), P(CL-co-AVL)-LD-g-O3HT-15 (red) and P(CL-co-AVL)-HD-g-O3HT-15 (blue)

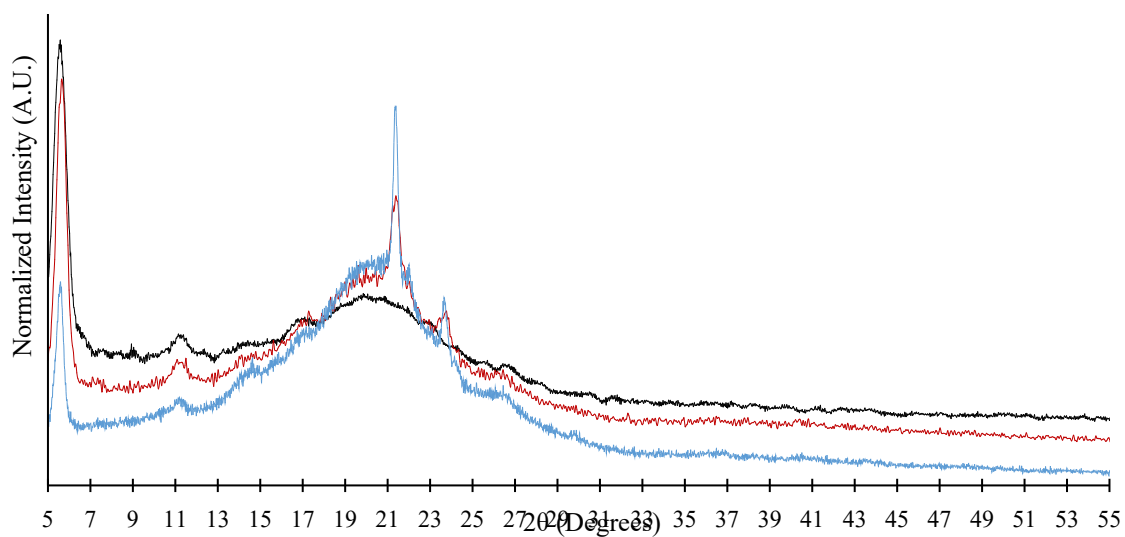

Figure S31: Normalized XRD spectra of O3HT-30 (black), P(CL-co-AVL)-LD-g-O3HT-30 (red) and P(CL-co-AVL)-HD-g-O3HT-30.

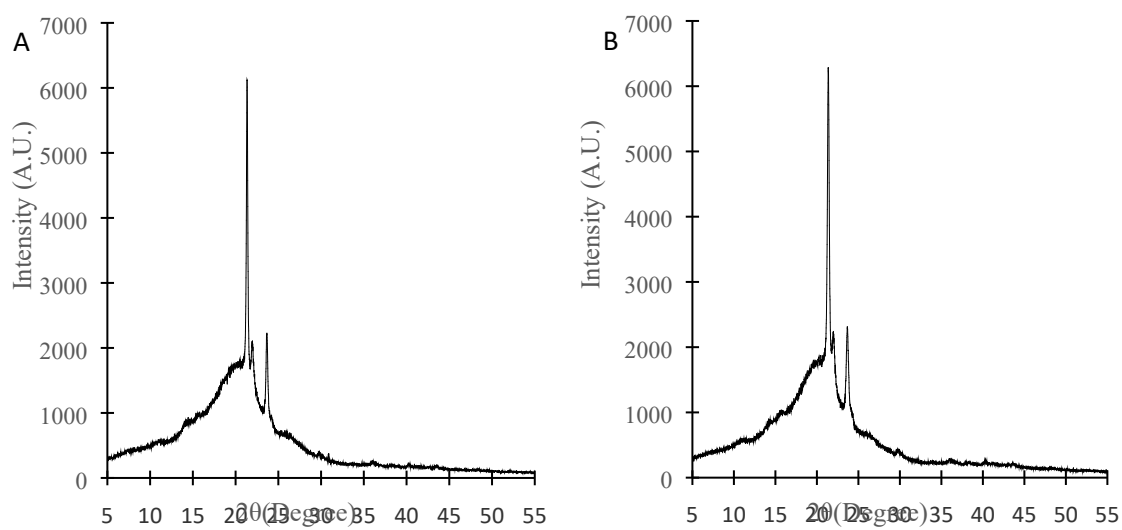

Figure S32: XRD spectra of (A) P(CL-co-AVL)-HD and (B) P(CL-co-AVL)-LD.

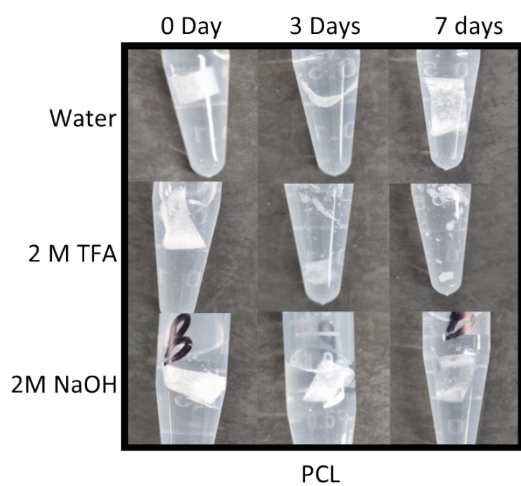

Figure S33: Optical photographs of PCL in water, 2 M TFA and 2 M NaOH at 0, 3 and 7 days.

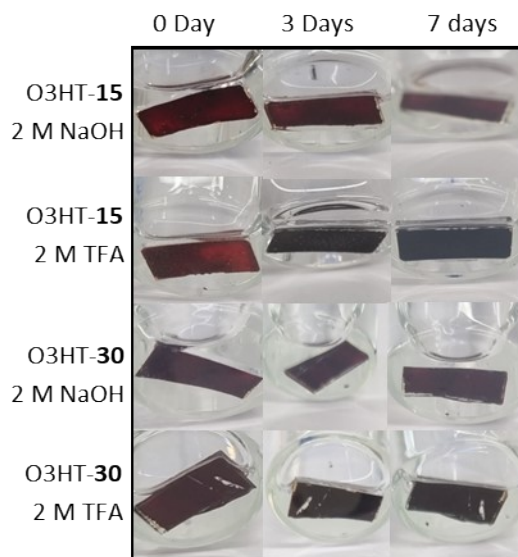

Figure S34: Optical photographs of O3HT-15 and O3HT-30 in 2 M TFA and 2 M NaOH at 0, 3 and 7 days.

Table S4. Conducting polymer-based transient electronic materials

| Polymer                                                                                          |                          | Electrical Properties                                                       | Degradation Method                                                    | Ref        |
|--------------------------------------------------------------------------------------------------|--------------------------|-----------------------------------------------------------------------------|-----------------------------------------------------------------------|------------|
| P(CL-co-AVL)-g-O3HT                                                                              | Degradable backbone      | 5.6 mS cm <sup>-1</sup>                                                     | Acid, base and enzymatic degradation                                  | This study |
| Gelatin-graft-poly(3-hexylthiophene)                                                             | Degradable backbone      | 1.65 ± 0.02 × 10 <sup>-7</sup> S/cm                                         | enzymatic degradation                                                 | 1          |
| PPy/PVDF (polyvinylidene fluoride)-based nanofibers                                              | Composite                | 12 to 24 S/cm                                                               | Acetone dissolution                                                   | 2          |
| PPy/chitosan                                                                                     | Composite                | 1 × 10 <sup>-2</sup> S/cm                                                   | Lysozyme enzymatic degradation and <i>in vivo</i> degradation in rats | 3          |
| PEDOT:PSS/montmorillonite                                                                        | Composite                | 8 to 16 S/cm                                                                | Ingestion by superworms                                               | 4          |
| PEDOT/carboxymethyl chitosan                                                                     | Composite                | 4.68 × 10 <sup>-3</sup> S/cm                                                | Enzymatic degradation lysozyme                                        | 5          |
| Oligoaniline-based electroactive blocks                                                          | Degradable backbone      | 8.34 × 10 <sup>-8</sup> S/cm                                                | Enzymatic degradation                                                 | 6          |
| Quaterthiophene-co-adipic acid polyester (QAPE)                                                  | Degradable backbone      | 10 <sup>-4</sup> S/cm                                                       | Enzymatic degradation                                                 | 7          |
| Polyester organogels with aniline oligomers                                                      | Degradable backbone      | 1.03 × 10 <sup>-5</sup> S/cm                                                | Acid hydrolysis                                                       | 8,9        |
| Poly(diketopyrrolopyrrole-phenylene diamine) (PDPP-PD)                                           | Degradable semiconductor | Charge mobility 0.03 cm <sup>2</sup> /V·s                                   | Acid-mediated degradation                                             | 10,11      |
| Poly(naphthalene diimide-co-(E,E)-N,N'-1,4-phenylenebis[1-(2-thienyl)methanimine]) (PNDIT2/IM-f) | Degradable semiconductor | electron mobility (μe) 0.04 cm <sup>2</sup> V <sup>-1</sup> s <sup>-1</sup> | Acid hydrolysis                                                       | 12         |
| Water-soluble transient conjugated polymer based on polypyrrole (PPY)                            | Soluble copolymer        | Capacitance value 73 mF/g                                                   | Water soluble                                                         | 13         |

## References

- 1 X. Sun, E. W. C. Chan, Q. Chen, N. Kirby, J. Yang, J. P. Mata, R. L. Kingston, D. Barker, L. Domigan and J. Travas-Sejdic, *ACS Appl. Mater. Interfaces*, 2024, **16**, 23872–23884.
- 2 S. Veeralingam and S. Badhulika, *ACS Appl. Bio Mater.*, 2021, **4**, 14–23.
- 3 Y. Wan, A. Yu, H. Wu, Z. Wang and D. Wen, *J. Mater. Sci. Mater. Med.*, 2005, **16**, 1017–1028.
- 4 S. Lee, Y. Hong and B. S. Shim, *Adv. Sustain. Syst.*, 2022, **6**, 2100056.
- 5 C. Xu, S. Guan, S. Wang, W. Gong, T. Liu, X. Ma and C. Sun, *Mater. Sci. Eng. C*, 2018, **84**, 32–43.
- 6 J. G. Hardy, D. J. Mouser, N. Arroyo-Currás, S. Geissler, J. K. Chow, L. Nguy, J. M. Kim and C. E. Schmidt, *J. Mater. Chem. B*, 2014, **2**, 6809–6822.
- 7 N. K. E. Guimard, J. L. Sessler and C. E. Schmidt, *Macromolecules*, 2009, **42**, 502–511.
- 8 B. Guo, A. Finne-Wistrand and A.-C. Albertsson, *Macromolecules*, 2011, **44**, 5227–5236.
- 9 B. Guo, A. Finne-Wistrand and A.-C. Albertsson, *J. Polym. Sci. Part Polym. Chem.*, 2011, **49**, 2097–2105.
- 10 T. Lei, M. Guan, J. Liu, H.-C. Lin, R. Pfattner, L. Shaw, A. F. McGuire, T.-C. Huang, L. Shao, K.-T. Cheng, J. B.-H. Tok and Z. Bao, *Proc. Natl. Acad. Sci.*, 2017, **114**, 5107–5112.
- 11 H. Tran, V. R. Feig, K. Liu, H.-C. Wu, R. Chen, J. Xu, K. Deisseroth and Z. Bao, *ACS Cent. Sci.*, 2019, **5**, 1884–1891.
- 12 H. Park, Y. Kim, D. Kim, S. Lee, F. S. Kim and B. J. Kim, *Adv. Funct. Mater.*, 2022, **32**, 2106977.
- 13 J. Moon, V. Diaz, D. Patel, R. Underwood and R. Warren, *Org. Electron.*, 2022, **101**, 106412.
